# Supplementary material for: Association between Individual Norepinephrine Transporter (NET) Availability and Response to Pharmacological Therapy in Adults with Attention-Deficit/Hyperactivity Disorder (ADHD)
Source: MDPI journal article supplement (doi:10.3390/brainsci12080965), 2022-07-22
Supplement: s1 [file s1]

## Supplementary Materials

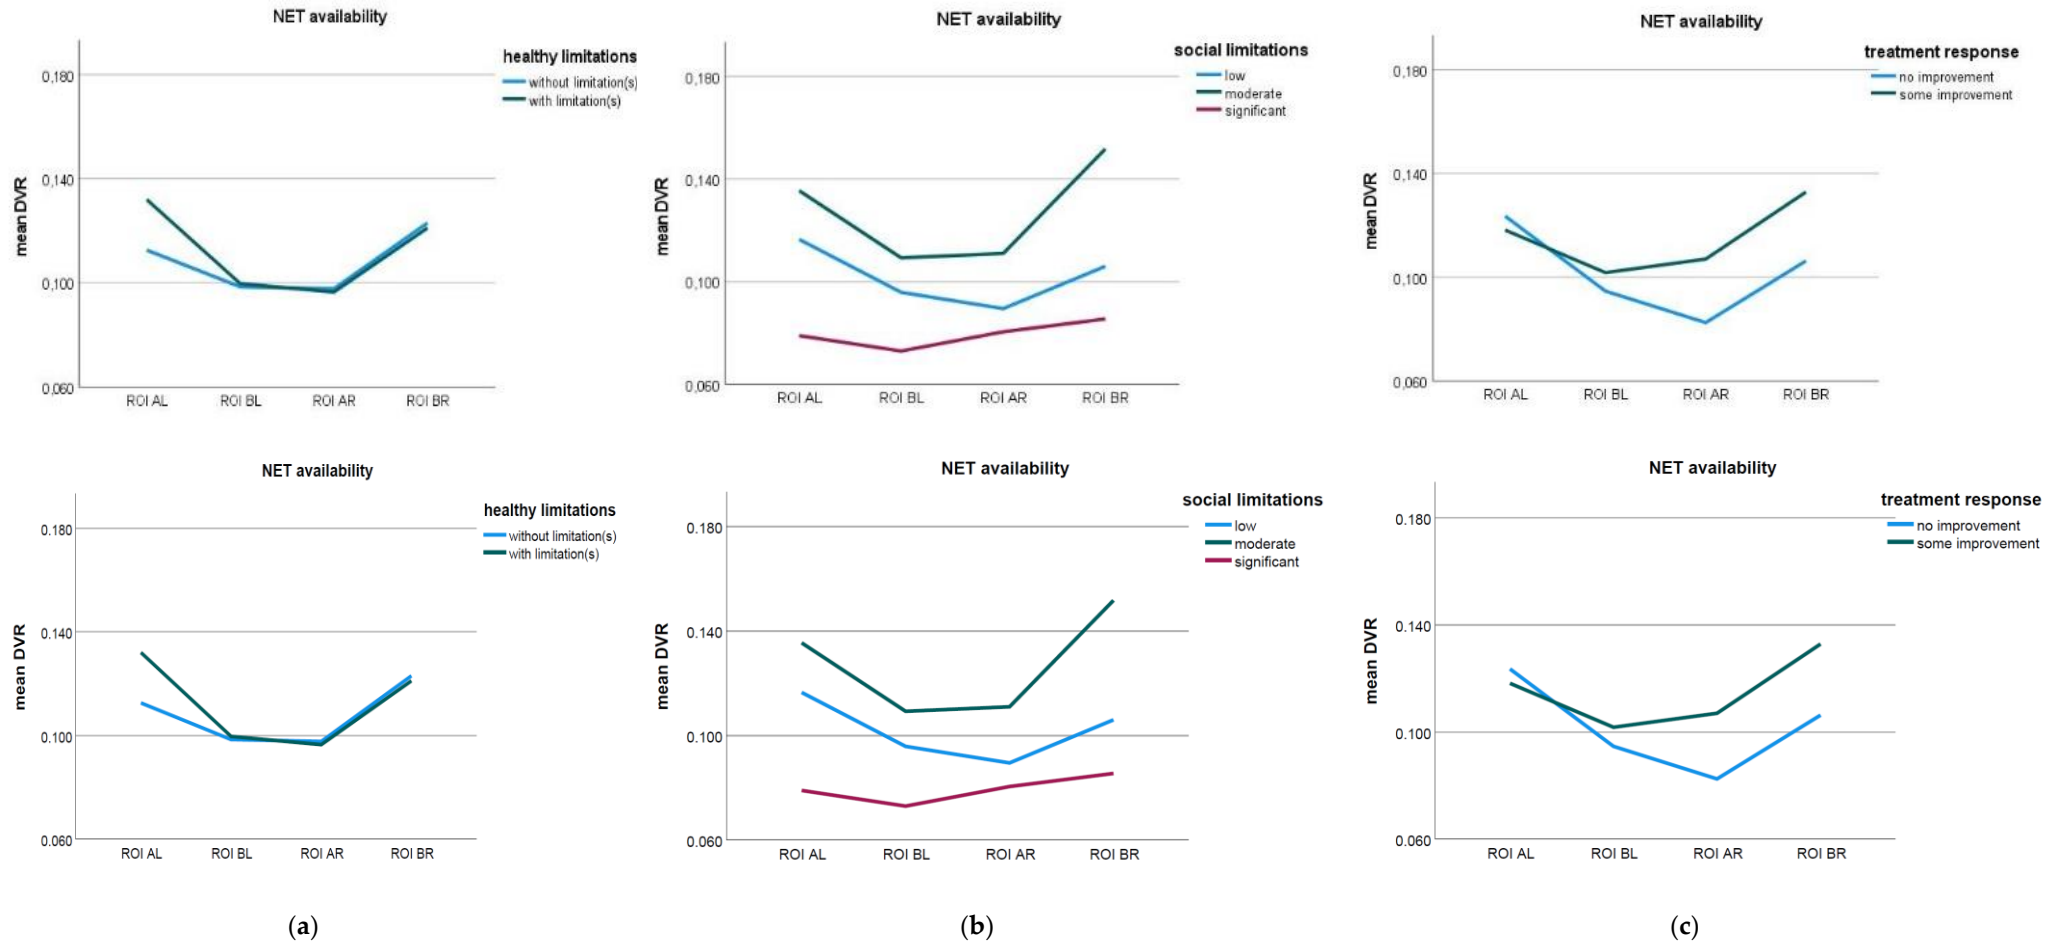

**Figure S1.** Mean distributed volume ratios (DVRs) in selected regions of interest (ROIs) for (a) patients with and without diagnosed comorbidities and/or physical disease; (b) patients with different levels of social impairments; (c) patients with and without improvement in CAARS DSM-Global raw scores. Note: AL, attention-related ROI of left hemisphere; BL, behavior-related ROI of left hemisphere; AR, attention-related ROI of right hemisphere; BR, behavior-related ROI of right hemisphere.
